# Supplementary material
Source: publisher site journal article supplement (https://www.spandidos-publications.com/3893/downloadSupplementary)
Supplement: Supplementary file 1 [file downloadSupplementary]

Data S1. Methodology. PubMed and Embase databases were used to search for relevant articles. The following search strategies were used for PubMed: ('Pulmonary Embolism' [Mesh]) AND ('rehabilitation' [Mesh]) and for Embase: ('pulmonary embolism':ti,ab,kw AND 'rehabilitation':ti,ab,kw). Articles were included if they described the treatment of patients with PE for pulmonary rehabilitation. The observation indicators and the year of publication were not limited. Abstracts, case reports and conference summary were excluded. A total of 715 studies were identified from the two databases. After evaluation of the titles and full texts of articles, eight studies were included for the present review.
